# Supplementary material for: Downregulation of Salivary Proteins, Protective against Dental Caries, in Type 1 Diabetes
Source: MDPI journal article supplement (doi:10.3390/proteomes9030033), 2021-07-19
Supplement: s1 [file s1]

**Supplementary Table 5. Selection of differentially expressed proteins involved in caries. Fold change, Log2ratio and L2R\_pvalues are presented.**

| gene          | G1.vs.C.<br>L2R | G1.vs.C.<br>L2R.pvalue | G1.vs.C.<br>fold<br>change | G2.vs.C.<br>L2R | G2.vs.C.<br>L2R.pvalue | G2.vs.C.<br>fold<br>change | G1.vs.G2<br>.L2R | G1.vs.G2.<br>L2R.pvalue | G1.vs.G2<br>.fold<br>change |
|---------------|-----------------|------------------------|----------------------------|-----------------|------------------------|----------------------------|------------------|-------------------------|-----------------------------|
| <b>S100A7</b> | -0.755          | 5.33E-07               | -1.688                     | -0.253          | 0.019                  | -1.192                     | -0.502           | 0.0001                  | -1.416                      |
| <b>AMY2B</b>  | -0.629          | 3.03E-05               | -1.546                     | -0.467          | 1.39E-05               | -1.382                     | -0.162           | 0.225                   | -1.119                      |
| <b>DEFB4A</b> | -0.623          | 3.60E-05               | -1.540                     | -0.379          | 0.0004                 | -1.300                     | -0.244           | 0.066                   | -1.184                      |
| <b>DCD</b>    | -0.520          | 0.005                  | -1.434                     | -0.453          | 2.54E-05               | -1.369                     | -0.067           | 0.617                   | -1.048                      |
| <b>RBP4</b>   | -0.504          | 0.001                  | -1.418                     | 0.005           | 0.960                  | 1.003                      | -0.509           | 0.0001                  | -1.423                      |
| <b>BPIFB2</b> | -0.405          | 0.007                  | -1.324                     | -0.231          | 0.032                  | -1.174                     | -0.173           | 0.1928                  | -1.127                      |
| <b>PRB2</b>   | -0.399          | 0.008                  | -1.319                     | 0.294           | 0.006                  | 1.226                      | -0.693           | 1.59E-07                | -1.617                      |
| <b>MUC19</b>  | -0.347          | 0.022                  | -1.272                     | -0.321          | 0.003                  | -1.249                     | -0.026           | 0.852                   | -1.018                      |
| <b>MUC5B</b>  | -0.336          | 0.026                  | -1.262                     | -0.244          | 0.024                  | -1.184                     | -0.093           | 0.491                   | -1.067                      |
| <b>IL36G</b>  | -0.319          | 0.035                  | -1.247                     | 0.113           | 0.289                  | 1.081                      | -0.432           | 0.001                   | -1.349                      |
| <b>AMY1A</b>  | -0.313          | 0.039                  | -1.242                     | -0.082          | 0.448                  | -1.058                     | -0.230           | 0.082                   | -1.173                      |
| <b>STATH</b>  | -0.304          | 0.045                  | -1.235                     | -0.006          | 0.964                  | -1.004                     | -0.298           | 0.024                   | -1.229                      |
| CST3          | -0.289          | 0.056                  | -1.222                     | -0.176          | 0.102                  | -1.130                     | -0.113           | 0.398                   | -1.081                      |
| <b>APOA2</b>  | -0.289          | 0.056                  | -1.222                     | 0.232           | 0.029                  | 1.174                      | -0.521           | 8.14E-05                | -1.435                      |
| CST5          | -0.274          | 0.071                  | -1.209                     | -0.011          | 0.921                  | -1.008                     | -0.262           | 0.048                   | -1.199                      |
| KRT9          | -0.268          | 0.078                  | -1.204                     | -0.220          | 0.041                  | -1.165                     | -0.048           | 0.725                   | -1.034                      |
| <b>BPIFB1</b> | -0.264          | 0.082                  | -1.201                     | 0.080           | 0.450                  | 1.057                      | -0.344           | 0.009                   | -1.269                      |
| APOA1         | -0.261          | 0.085                  | -1.198                     | 0.319           | 0.002                  | 1.247                      | -0.581           | 1.13E-05                | -1.496                      |
| MUC7          | -0.249          | 0.101                  | -1.188                     | -0.306          | 0.004                  | -1.236                     | 0.057            | 0.656                   | 1.040                       |
| SERPINC1      | -0.222          | 0.143                  | -1.166                     | 0.082           | 0.440                  | 1.058                      | -0.304           | 0.021                   | -1.235                      |
| <b>CST4</b>   | -0.216          | 0.154                  | -1.162                     | 0.065           | 0.538                  | 1.046                      | -0.282           | 0.033                   | -1.216                      |
| <b>CST1</b>   | -0.201          | 0.187                  | -1.149                     | 0.075           | 0.479                  | 1.053                      | -0.276           | 0.037                   | -1.211                      |
| <b>C6</b>     | -0.183          | 0.230                  | -1.135                     | 0.152           | 0.153                  | 1.111                      | -0.335           | 0.011                   | -1.261                      |
| <b>C3</b>     | -0.163          | 0.285                  | -1.120                     | 0.103           | 0.334                  | 1.074                      | -0.266           | 0.045                   | -1.202                      |
| <b>C9</b>     | -0.161          | 0.291                  | -1.118                     | 0.143           | 0.179                  | 1.104                      | -0.305           | 0.021                   | -1.235                      |
| <b>BPI</b>    | -0.121          | 0.429                  | -1.087                     | 0.136           | 0.201                  | 1.099                      | -0.258           | 0.052                   | -1.196                      |
| <b>KRT77</b>  | 0.198           | 0.181                  | 1.147                      | -0.035          | 0.749                  | -1.025                     | 0.233            | 0.074                   | 1.175                       |
| <b>KRT19</b>  | 0.291           | 0.050                  | 1.223                      | 0.015           | 0.883                  | 1.010                      | 0.276            | 0.035                   | 1.211                       |
| <b>DEFA3</b>  | 0.292           | 0.049                  | 1.224                      | 0.155           | 0.146                  | 1.113                      | 0.137            | 0.292                   | 1.100                       |
| <b>DEFA1</b>  | 0.296           | 0.046                  | 1.228                      | 0.290           | 0.006                  | 1.223                      | 0.006            | 0.950                   | 1.004                       |
| <b>SPRR1A</b> | 0.328           | 0.027                  | 1.255                      | 0.069           | 0.514                  | 1.049                      | 0.259            | 0.048                   | 1.197                       |
| <b>KRT74</b>  | 0.419           | 0.005                  | 1.337                      | 0.000           | 1                      | 1.000                      | 0.419            | 0.001                   | 1.337                       |
| ATP11B        | 0.557           | 0.001                  | 1.471                      | 0.065           | 0.541                  | 1.046                      | 0.492            | 0.0001                  | 1.406                       |
| <b>PRR4</b>   | 0.582           | 9.79E-05               | 1.497                      | -0.329          | 0.002                  | -1.256                     | 0.911            | 4.34E-12                | 1.880                       |
| <b>ORM2</b>   | -0.334          | 0.027                  | -1.261                     | 0.163           | 0.125                  | 1.120                      | -0.498           | 0.0001                  | -1.412                      |
| <b>ALB</b>    | -0.342          | 0.023                  | -1.268                     | 0.225           | 0.034                  | 1.169                      | -0.568           | 1.73E-05                | -1.482                      |
